# Supplementary material
Source: PubMed Central journal article supplement (PMC7825861)

# THE LANCET Oncology

## Supplementary appendix

This appendix formed part of the original submission and has been peer reviewed.  
We post it as supplied by the authors.

Supplement to: Spencer K, Jones CM, Girdler R, et al. The impact of the COVID-19 pandemic on radiotherapy services in England, UK: a population-based study. *Lancet Oncol* 2021; published online Jan 22. [http://dx.doi.org/10.1016/S1470-2045\(20\)30743-9](http://dx.doi.org/10.1016/S1470-2045(20)30743-9).

# The impact of the COVID-19 pandemic on radiotherapy services in England, UK: A population-based study from the National Radiotherapy Dataset

Katie Spencer PhD, Christopher Jones MRCP, Rebecca Girdler PGCE, Catherine Roe MSc, Michael Sharpe BSc, Sarah Lawton MPH, Louise Miller MA, Philippa Lewis FRCR, Mererid Evans PhD, Prof David Sebag-Montefiore FRCR, Tom Roques FRCR, Rebecca Smittenaar PhD, Prof Eva Morris PhD

## Web appendix

**Table 1s. Diagnostic groupings by ICD-10 code:**

| Diagnosis                    | ICD-10 code     |
|------------------------------|-----------------|
| Anal                         | C21             |
| Bladder                      | C67             |
| Brain/CNS                    | C70-C71,D32-D33 |
| Breast                       | C50,D05         |
| Cervix                       | C53             |
| Head and neck                | C00-C14,C30-C32 |
| Lung                         | C33-C34         |
| Lymphoma                     | C81-C85         |
| Oesophageal                  | C15             |
| Prostate                     | C61             |
| Rectal                       | C20             |
| Non-melanomatous skin cancer | C44             |

All morphological subtypes are included in each group.

**Table 2s. Details of missing data:**

During the study period a small number of centres failed to complete the monthly data submission to Public Health England. These were more frequent in recent months and were as follows:

| Month          | Data completeness |
|----------------|-------------------|
| Feb 2019       | Complete          |
| March 2019     | Complete          |
| April 2019     | Complete          |
| May 2019       | Complete          |
| June 2019      | Complete          |
| July 2019      | Complete          |
| August 2019    | Complete          |
| September 2019 | 1 centre missing  |
| October 2019   | Complete          |
| November 2019  | Complete          |
| December 2019  | Complete          |
| January 2020   | 1 centre missing  |
| February 2020  | 1 centre missing  |
| March 2020     | Complete          |
| April 2020     | Complete          |
| May 2020       | Complete          |
| June 2020      | 4 centres missing |

**Regression equation:**

$$\text{Courses at time}(t) = \beta_0 + \beta_1 * \text{Time} + \beta_2 * \text{Bank holiday} + \beta_3 * \text{Christmas} + \beta_4 * \text{Pandemic} + \beta_5 * \text{Recovery} + \beta_6 * \text{Seasonality vector} + \beta_7 * \text{Pandemic} * \text{Time} + \beta_8 * \text{Recovery} * \text{Time} + \text{error}$$

**Table 3s**

Average weekly courses and attendances in February-June 2019 in the overall treated population. These numbers provide the baseline data on which the % change in table 1 is calculated.

|                     | Courses |        |        |        |        | Attendances |        |        |        |        |
|---------------------|---------|--------|--------|--------|--------|-------------|--------|--------|--------|--------|
|                     | Feb-19  | Mar-19 | Apr-19 | May-19 | Jun-19 | Feb-19      | Mar-19 | Apr-19 | May-19 | Jun-19 |
| <b>Total</b>        | 2738    | 2656   | 2526   | 2425   | 2633   | 37384       | 37938  | 35332  | 33665  | 36130  |
| Std dev.            | 74.3    | 65.5   | 178.2  | 172.1  | 59.6   | 745.4       | 307.8  | 2543.8 | 2776.1 | 232.7  |
| <b>Other</b>        | 42      | 35     | 19     | 10     | 8      | 280         | 282    | 176    | 126    | 89     |
| Std dev.            | 6.1     | 9.5    | 13.4   | 2.0    | 0.8    | 13.8        | 32.5   | 57.6   | 18.6   | 13.1   |
| <b>Palliative</b>   | 847     | 842    | 817    | 801    | 909    | 3606        | 3634   | 3531   | 3317   | 3806   |
| Std dev.            | 56.4    | 45.4   | 55.8   | 96.3   | 32.0   | 116.3       | 162.1  | 263.4  | 359.3  | 99.0   |
| <b>Curative</b>     | 1849    | 1779   | 1689   | 1614   | 1716   | 33498       | 34022  | 31625  | 30223  | 32234  |
| Std dev.            | 21.9    | 32.3   | 133.8  | 90.4   | 44.0   | 707.6       | 345.8  | 2268.3 | 2434.5 | 269.0  |
| <b>Female&lt;70</b> | 880     | 853    | 814    | 796    | 854    | 11965       | 12609  | 11713  | 11278  | 12282  |
| Std dev.            | 19.5    | 10.4   | 54.9   | 31.2   | 18.1   | 408.9       | 194.0  | 770.5  | 976.1  | 63.0   |
| <b>Female≥70</b>    | 503     | 480    | 457    | 428    | 470    | 5687        | 5628   | 5177   | 4966   | 5308   |
| Std dev.            | 23.5    | 20.5   | 35.9   | 31.3   | 22.8   | 119.7       | 105.8  | 426.3  | 435.3  | 96.8   |
| <b>Male &lt;70</b>  | 588     | 576    | 541    | 523    | 571    | 9522        | 9555   | 8918   | 8518   | 8922   |
| Std dev.            | 24.2    | 22.6   | 38.8   | 46.0   | 15.7   | 83.0        | 25.9   | 592.1  | 676.4  | 66.7   |
| <b>Male ≥70</b>     | 768     | 748    | 714    | 678    | 738    | 10210       | 10146  | 9524   | 8904   | 9618   |
| Std dev.            | 29.6    | 35.7   | 62.0   | 76.4   | 46.1   | 204.3       | 15.8   | 767.8  | 691.7  | 69.6   |

**Table 4s**

Average weekly courses and attendances in February-June 2019 by individual diagnoses. These numbers provide the baseline data on which the % change in table 2 is calculated.

|                      | Courses |        |        |        |        | Attendances |        |        |        |        |
|----------------------|---------|--------|--------|--------|--------|-------------|--------|--------|--------|--------|
|                      | Feb-19  | Mar-19 | Apr-19 | May-19 | Jun-19 | Feb-19      | Mar-19 | Apr-19 | May-19 | Jun-19 |
| <b>Anal</b>          | 23      | 20     | 21     | 20     | 23     | 559         | 564    | 544    | 532    | 574    |
| Std dev              | 5.7     | 6.3    | 7.3    | 4.2    | 2.8    | 26.7        | 17.6   | 36.4   | 42.7   | 17.5   |
| <b>Bladder</b>       | 21      | 28     | 27     | 23     | 24     | 518         | 503    | 532    | 531    | 496    |
| Std dev              | 4.1     | 5.1    | 5.1    | 4.5    | 2.1    | 39.4        | 20.7   | 30.4   | 53.7   | 25.9   |
| <b>Brain</b>         | 65      | 68     | 53     | 58     | 58     | 1211        | 1430   | 1293   | 1128   | 1333   |
| Std dev              | 12.4    | 5.6    | 7.3    | 7.0    | 1.0    | 38.2        | 91.8   | 141.5  | 84.6   | 18.3   |
| <b>Breast</b>        | 632     | 626    | 597    | 580    | 616    | 9452        | 9854   | 9261   | 8986   | 9662   |
| Std dev              | 11.0    | 19.8   | 53.5   | 21.3   | 11.7   | 358.3       | 212.5  | 703.9  | 898.9  | 132.2  |
| <b>Cervix</b>        | 23      | 20     | 22     | 27     | 22     | 583         | 566    | 502    | 575    | 632    |
| Std dev              | 7.2     | 4.4    | 4.6    | 3.0    | 3.7    | 11.9        | 39.8   | 23.9   | 46.4   | 38.5   |
| <b>Head and Neck</b> | 124     | 115    | 121    | 112    | 118    | 3513        | 3437   | 3250   | 3211   | 3324   |
| Std dev              | 9.5     | 6.5    | 13.8   | 19.8   | 4.4    | 73.7        | 100.9  | 130.4  | 133.7  | 34.6   |
| <b>Lung</b>          | 128     | 129    | 141    | 132    | 125    | 1825        | 1917   | 2010   | 1886   | 1879   |
| Std dev              | 8.8     | 11.0   | 11.6   | 13.6   | 5.4    | 49.9        | 39.5   | 136.4  | 70.7   | 93.7   |
| <b>Lymphoma</b>      | 53      | 55     | 50     | 40     | 50     | 684         | 792    | 699    | 579    | 660    |
| Std dev              | 6.0     | 3.5    | 4.8    | 3.4    | 4.1    | 51.7        | 13.1   | 59.9   | 69.4   | 26.5   |
| <b>Oesophageal</b>   | 29      | 29     | 32     | 25     | 29     | 577         | 670    | 671    | 617    | 606    |
| Std dev              | 11.5    | 3.9    | 9.6    | 3.2    | 3.0    | 30.4        | 24.1   | 43.4   | 44.9   | 31.9   |
| <b>Other dx</b>      | 146     | 135    | 130    | 111    | 130    | 2438        | 2568   | 2300   | 2183   | 2298   |
| Std dev              | 10.6    | 7.9    | 15.7   | 23.4   | 11.6   | 39.4        | 26.3   | 174.3  | 198.9  | 44.4   |
| <b>Prostate</b>      | 421     | 382    | 346    | 342    | 360    | 9768        | 9290   | 8374   | 7901   | 8333   |
| Std dev              | 38.0    | 18.0   | 43.3   | 24.9   | 17.0   | 207.7       | 204.1  | 711.6  | 745.4  | 81.6   |
| <b>Rectal</b>        | 77      | 81     | 69     | 65     | 72     | 1323        | 1442   | 1371   | 1283   | 1490   |
| Std dev              | 5.0     | 9.3    | 10.9   | 9.2    | 10.4   | 28.6        | 91.0   | 123.9  | 98.7   | 36.1   |
| <b>Skin</b>          | 108     | 92     | 80     | 81     | 90     | 1048        | 992    | 820    | 813    | 949    |
| Std dev              | 15.0    | 2.6    | 16.2   | 19.7   | 16.5   | 48.9        | 84.1   | 128.5  | 80.8   | 46.1   |

**Table 5s.**

Interrupted time series analyses of the impact of the COVID-19 pandemic on radiotherapy courses and attendances in the English NHS. These results include adjustment for missing data by adding treatment courses and attendances in line with the proportion of activity usually observed in those centres where data had not yet been submitted.

|                                | Coef.      | p       | L 95% CI    | U 95% CI   |
|--------------------------------|------------|---------|-------------|------------|
| <b>a) Adjusted courses</b>     |            |         |             |            |
| Pandemic                       | -3001.461  | <0.0001 | -3325.291   | -2677.632  |
| Seasonality terms              |            |         |             |            |
| Cos 1                          | 45.509     | <0.0001 | 37.443      | 53.575     |
| Cos 2                          | 12.595     | 0.055   | -0.256      | 25.446     |
| Sin 1                          | -24.643    | <0.0001 | -34.745     | -14.540    |
| Sin 2                          | -16.621    | 0.025   | -31.141     | -2.100     |
| Time (weeks)                   | -1.805     | <0.0001 | -2.124      | -1.486     |
| Bank holiday                   | -337.789   | <0.0001 | -362.871    | -312.707   |
| Christmas                      | -1234.414  | <0.0001 | -1270.627   | -1198.201  |
| Recovery                       | -484.356   | 0.016   | -877.762    | -90.950    |
| Recovery-Time interaction      | 3.213      | 0.287   | -2.705      | 9.131      |
| Pandemic-Time interaction      | 42.715     | <0.0001 | 37.721      | 47.709     |
| Constant                       | 2690.576   | <0.0001 | 2680.285    | 2700.868   |
| <b>b) Adjusted attendances</b> |            |         |             |            |
| Pandemic                       | 42032.410  | <0.0001 | 33458.790   | 50606.040  |
| Seasonality terms              |            |         |             |            |
| Cos 1                          | 456.471    | <0.0001 | 309.221     | 603.721    |
| Cos 2                          | -178.053   | 0.193   | -446.326    | 90.220     |
| Sin 1                          | 72.109     | 0.402   | -96.454     | 240.671    |
| Sin 2                          | 188.120    | 0.123   | -51.042     | 427.283    |
| Time (weeks)                   | -27.844    | <0.0001 | -32.447     | -23.241    |
| Bank holiday                   | -4993.044  | <0.0001 | -5831.737   | -4154.350  |
| Christmas                      | -8617.681  | <0.0001 | -9541.588   | -7693.775  |
| Recovery                       | -92648.890 | <0.0001 | -104230.700 | -81067.050 |
| Recovery-Time interaction      | 1342.879   | <0.0001 | 1171.034    | 1514.724   |
| Pandemic-Time interaction      | -774.407   | <0.0001 | -908.180    | -640.633   |
| Constant                       | 37161.740  | <0.0001 | 36966.750   | 37356.720  |

**Table 6s**

Interrupted time-series analysis assessing the impact of the pandemic upon radiotherapy a) courses and b) attendances in the English NHS. Sensitivity analysis based upon observed data.

|                                | <b>Coef.</b> | <b>p</b> | <b>L 95% CI</b> | <b>U 95% CI</b> |
|--------------------------------|--------------|----------|-----------------|-----------------|
| <b>a) Observed courses</b>     |              |          |                 |                 |
| Pandemic                       | -2927.723    | <0.0001  | -3250.424       | -2605.023       |
| Seasonality terms              |              |          |                 |                 |
| Cos 1                          | 48.146       | <0.0001  | 39.348          | 56.944          |
| Cos 2                          | 9.997        | 0.156    | -3.814          | 23.807          |
| Sin 1                          | -23.215      | <0.0001  | -34.891         | -11.538         |
| Sin 2                          | -23.541      | 0.002    | -38.397         | -8.685          |
| Time (weeks)                   | -2.051       | <0.0001  | -2.423          | -1.678          |
| Bank holiday                   | -336.823     | <0.0001  | -361.641        | -312.005        |
| Christmas                      | -1232.903    | <0.0001  | -1270.357       | -1195.450       |
| Recovery                       | -557.457     | 0.005    | -948.614        | -166.299        |
| Recovery-Time interaction      | 1.568        | 0.600    | -4.301          | 7.437           |
| Pandemic-Time interaction      | 41.734       | <0.0001  | 36.788          | 46.680          |
| Constant                       | 2692.751     | <0.0001  | 2681.346        | 2704.155        |
| <b>b) Observed attendances</b> |              |          |                 |                 |
| Pandemic                       | 42923.510    | <0.0001  | 34231.080       | 51615.940       |
| Seasonality terms              |              |          |                 |                 |
| Cos 1                          | 481.321      | <0.0001  | 318.744         | 643.897         |
| Cos 2                          | -212.248     | 0.150    | -501.235        | 76.739          |
| Sin 1                          | 80.303       | 0.362    | -92.319         | 252.925         |
| Sin 2                          | 108.213      | 0.419    | -154.243        | 370.669         |
| Time (weeks)                   | -31.122      | <0.0001  | -36.593         | -25.651         |
| Bank holiday                   | -4981.282    | <0.0001  | -5809.700       | -4152.864       |
| Christmas                      | -8589.922    | <0.0001  | -9502.971       | -7676.873       |
| Recovery                       | -93764.430   | <0.0001  | -105633.500     | -81895.350      |
| Recovery-Time interaction      | 1329.855     | <0.0001  | 1153.663        | 1506.046        |
| Pandemic-Time interaction      | -786.011     | <0.0001  | -921.773        | -650.250        |
| Constant                       | 37197.880    | <0.0001  | 36973.630       | 37422.130       |

**Table 7s.**

Fractionation category delivered for a) curative radiotherapy courses and b) palliative courses. Average weekly courses per month displayed with standard deviation (SD) and proportion of activity per fractionation category below. Courses included here are those relating to the diagnoses documented in table 1s for both 7s(a) and (b).

| a) Dose per fraction               |      | Feb 2019 - Jan 2020 |              |               |                 |                      | Apr-20          |              |               |                 |                      |
|------------------------------------|------|---------------------|--------------|---------------|-----------------|----------------------|-----------------|--------------|---------------|-----------------|----------------------|
|                                    |      | <2Gy                | 2-2.49Gy     | 2.5-4.99Gy    | ≥5Gy            | Other/unknown        | <2Gy            | 2-2.49Gy     | 2.5-4.99Gy    | ≥5Gy            | Other/unknown        |
| <b>Brain</b>                       | Mean | 17.3                | 20.2         | 7.7           | 8.1             | 3.7                  | 9.0             | 10.3         | 13.0          | 3.0             | 3.3                  |
|                                    | SD   | 5.2                 | 4.5          | 3.0           | 3.5             | 1.7                  | 4.1             | 2.4          | 5.0           | 3.6             | 1.7                  |
|                                    | %    | 30.3                | 35.5         | 13.6          | 14.2            | 6.4                  | 23.4            | 26.6         | 33.8          | 7.8             | 8.4                  |
| <b>Bladder</b>                     | Mean | 0.4                 | 5.7          | 15.1          | 2.2             | 0.3                  | 0.5             | 3.0          | 38.0          | 3.5             | 0.0                  |
|                                    | SD   | 0.6                 | 3.0          | 4.5           | 1.5             | 0.5                  | 1.0             | 1.8          | 4.5           | 2.4             | 0.0                  |
|                                    | %    | 1.9                 | 24.0         | 63.7          | 9.3             | 1.1                  | 1.1             | 6.7          | 84.4          | 7.8             | 0.0                  |
| <b>Breast</b>                      | Mean | 1.2                 | 4.7          | 582.0         | 13.2            | 4.0                  | 0.8             | 1.5          | 209.0         | 357.0           | 1.8                  |
|                                    | SD   | 1.3                 | 2.2          | 64.9          | 4.4             | 1.9                  | 0.5             | 1.7          | 13.6          | 80.3            | 1.5                  |
|                                    | %    | 0.2                 | 0.8          | 96.2          | 2.2             | 0.7                  | 0.1             | 0.3          | 36.7          | 62.6            | 0.3                  |
| <b>Cervix</b>                      | Mean | 17.1                | 4.3          | 0.3           | 0.3             | 0.2                  | 14.8            | 6.8          | 0.0           | 0.3             | 0.0                  |
|                                    | SD   | 4.4                 | 2.2          | 0.5           | 0.7             | 0.4                  | 3.3             | 2.4          | 0.0           | 0.5             | 0.0                  |
|                                    | %    | 77.1                | 19.2         | 1.5           | 1.6             | 0.7                  | 67.8            | 31.0         | 0.0           | 1.1             | 0.0                  |
| <b>Head and neck</b>               | Mean | 1.9                 | 96.7         | 18.3          | 0.9             | 0.5                  | 2.3             | 77.5         | 50.3          | 0.8             | 1.5                  |
|                                    | SD   | 1.5                 | 11.8         | 4.8           | 0.9             | 0.7                  | 1.0             | 13.8         | 9.9           | 0.5             | 1.3                  |
|                                    | %    | 1.6                 | 81.7         | 15.5          | 0.7             | 0.4                  | 1.7             | 58.6         | 38.0          | 0.6             | 1.1                  |
| <b>Lung</b>                        | Mean | 7.7                 | 17.4         | 56.6          | 50.5            | 0.8                  | 1.5             | 6.0          | 77.5          | 52.5            | 1.0                  |
|                                    | SD   | 3.5                 | 4.5          | 9.4           | 9.2             | 1.2                  | 1.3             | 3.2          | 7.5           | 10.5            | 0.8                  |
|                                    | %    | 5.8                 | 13.1         | 42.5          | 38.0            | 0.6                  | 1.1             | 4.3          | 56.0          | 37.9            | 0.7                  |
| <b>Lymphoma</b>                    | Mean | 4.5                 | 41.0         | 2.7           | 0.3             | 0.4                  | 3.0             | 20.8         | 11.0          | 4.8             | 0.0                  |
|                                    | SD   | 2.3                 | 6.4          | 1.6           | 0.5             | 0.7                  | 2.2             | 5.4          | 5.2           | 2.1             | 0.0                  |
|                                    | %    | 9.1                 | 84.0         | 5.4           | 0.7             | 0.7                  | 7.6             | 52.5         | 27.8          | 12.0            | 0.0                  |
| <b>Oesophageal</b>                 | Mean | 8.2                 | 14.4         | 5.0           | 1.2             | 0.1                  | 4.0             | 27.3         | 13.3          | 1.3             | 0.0                  |
|                                    | SD   | 3.3                 | 4.5          | 2.3           | 1.3             | 0.2                  | 2.3             | 10.6         | 6.8           | 1.0             | 0.0                  |
|                                    | %    | 28.3                | 49.9         | 17.4          | 4.2             | 0.2                  | 8.7             | 59.6         | 29.0          | 2.7             | 0.0                  |
| <b>Prostate</b>                    | Mean | 3.1                 | 100.9        | 231.8         | 15.4            | 2.1                  | 1.0             | 14.0         | 56.8          | 7.5             | 0.3                  |
|                                    | SD   | 1.7                 | 20.6         | 43.3          | 4.1             | 2.2                  | 0.8             | 3.8          | 8.3           | 1.0             | 0.5                  |
|                                    | %    | 0.9                 | 28.6         | 65.6          | 4.4             | 0.6                  | 1.3             | 17.6         | 71.4          | 9.4             | 0.3                  |
| <b>Rectal</b>                      | Mean | 44.4                | 9.0          | 2.3           | 18.1            | 0.4                  | 22.3            | 5.5          | 4.0           | 61.3            | 0.8                  |
|                                    | SD   | 8.1                 | 3.0          | 1.6           | 4.8             | 0.6                  | 4.9             | 1.9          | 5.0           | 24.5            | 1.5                  |
|                                    | %    | 59.8                | 12.1         | 3.1           | 24.4            | 0.5                  | 23.7            | 5.9          | 4.3           | 65.3            | 0.8                  |
| <b>Skin</b>                        | Mean | 0.5                 | 7.0          | 45.1          | 34.9            | 1.1                  | 0.0             | 1.8          | 13.0          | 6.5             | 0.8                  |
|                                    | SD   | 0.8                 | 2.9          | 10.7          | 11.2            | 1.2                  | 0.0             | 1.3          | 4.1           | 2.5             | 1.0                  |
|                                    | %    | 0.5                 | 7.9          | 51.0          | 39.4            | 1.2                  | 0.0             | 8.0          | 59.1          | 29.5            | 3.4                  |
|                                    |      |                     |              |               |                 |                      |                 |              |               |                 |                      |
| <b>b) Palliative fractionation</b> |      | <b>Single #</b>     | <b>2-5 #</b> | <b>6-10 #</b> | <b>&gt;10 #</b> | <b>Other/unknown</b> | <b>Single #</b> | <b>2-5 #</b> | <b>6-10 #</b> | <b>&gt;10 #</b> | <b>Other/unknown</b> |
| <b>Palliative</b>                  | Mean | 229.4               | 227.8        | 87.4          | 37.6            | 4.4                  | 232.5           | 153.5        | 47.3          | 26.5            | 2.8                  |
|                                    | SD   | 22.7                | 28.3         | 12.3          | 6.7             | 2.1                  | 31.8            | 25.6         | 3.4           | 4.8             | 1.5                  |
|                                    | %    | 39.1                | 38.8         | 14.9          | 6.4             | 0.8                  | 50.3            | 33.2         | 10.2          | 5.7             | 0.6                  |

**Table 8s.**

ITS regression of breast cancer fractionation patterns. IRR – Incidence Rate Ratio. Based upon course numbers adjusted for missing data.

|                                    | IRR     | p       | L 95% CI | U 95% CI |
|------------------------------------|---------|---------|----------|----------|
| <b>26 Gy in 5#</b>                 |         |         |          |          |
| Pandemic                           | 77.546  | <0.0001 | 11.065   | 543.449  |
| Time (weeks)                       | 1.026   | 0.137   | 0.992    | 1.062    |
| Bank holiday                       | 1.028   | 0.764   | 0.857    | 1.234    |
| Christmas                          | 0.000   | 0.993   | 0.000    | .        |
| Pandemic-Time interaction          | 1.001   | 0.945   | 0.962    | 1.042    |
| Constant                           | 0.682   | 0.586   | 0.172    | 2.706    |
| <b>40 Gy in 15#</b>                |         |         |          |          |
| Pandemic                           | 4.746   | 0.005   | 1.598    | 14.095   |
| Seasonality terms                  |         |         |          |          |
| Cos 1                              | 1.026   | 0.073   | 0.998    | 1.055    |
| Cos 2                              | 1.010   | 0.495   | 0.982    | 1.038    |
| Sin 1                              | 0.980   | 0.239   | 0.948    | 1.013    |
| Sin 2                              | 0.991   | 0.504   | 0.964    | 1.018    |
| Time (weeks)                       | 1.000   | 0.809   | 0.998    | 1.001    |
| Bank holiday                       | 0.942   | 0.054   | 0.887    | 1.001    |
| Christmas                          | 0.345   | <0.0001 | 0.267    | 0.445    |
| Pandemic-Time interaction          | 0.963   | <0.0001 | 0.947    | 0.979    |
| Constant                           | 566.792 | <0.0001 | 541.557  | 593.202  |
| <b>Other fractionation pattern</b> |         |         |          |          |
| Pandemic                           | 6.500   | 0.015   | 1.443    | 29.273   |
| Time (weeks)                       | 0.998   | 0.094   | 0.996    | 1.000    |
| Bank holiday                       | 0.932   | 0.185   | 0.839    | 1.034    |
| Christmas                          | 0.371   | <0.0001 | 0.229    | 0.601    |
| Pandemic-Time interaction          | 0.967   | 0.004   | 0.945    | 0.989    |
| Constant                           | 56.624  | <0.0001 | 52.624   | 60.929   |



**Figure 1s**

Waterfall plots illustrating the percentage change in treatment courses by provider organisation in April, May and June 2020 compared to the equivalent months in 2019. Four providers are excluded in June due to missing data. One very small provider is seen to have an increase in courses of 13.3% in April 2020 compared to April 2019.

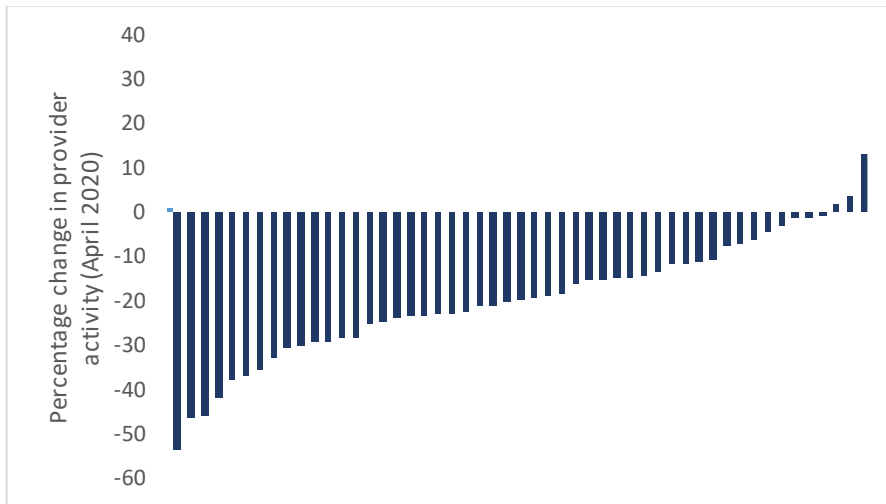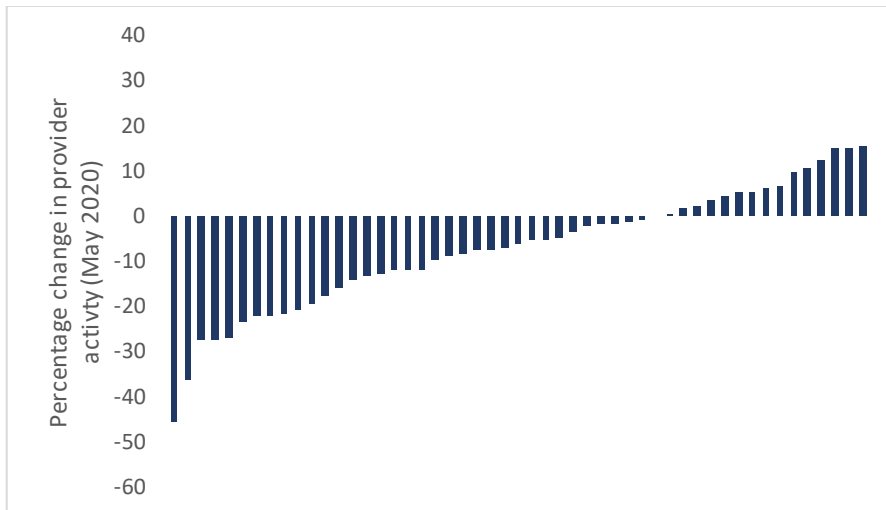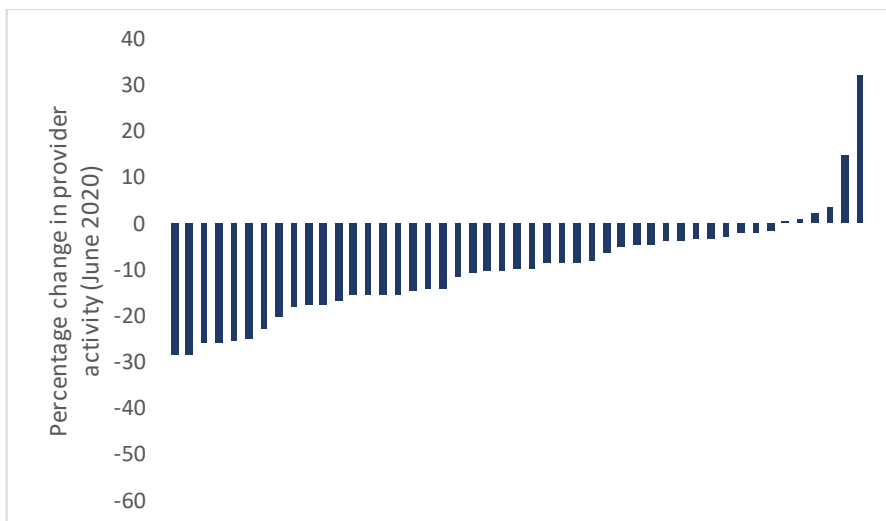

**Figure 2s**

Bar chart illustrating the change in weekly average courses observed between February and June 2020 by NHS England region. These data are not adjusted for missing and as such the data for June are not presented as the consequences of missing data cannot be disentangled from the ongoing effects of the pandemic.

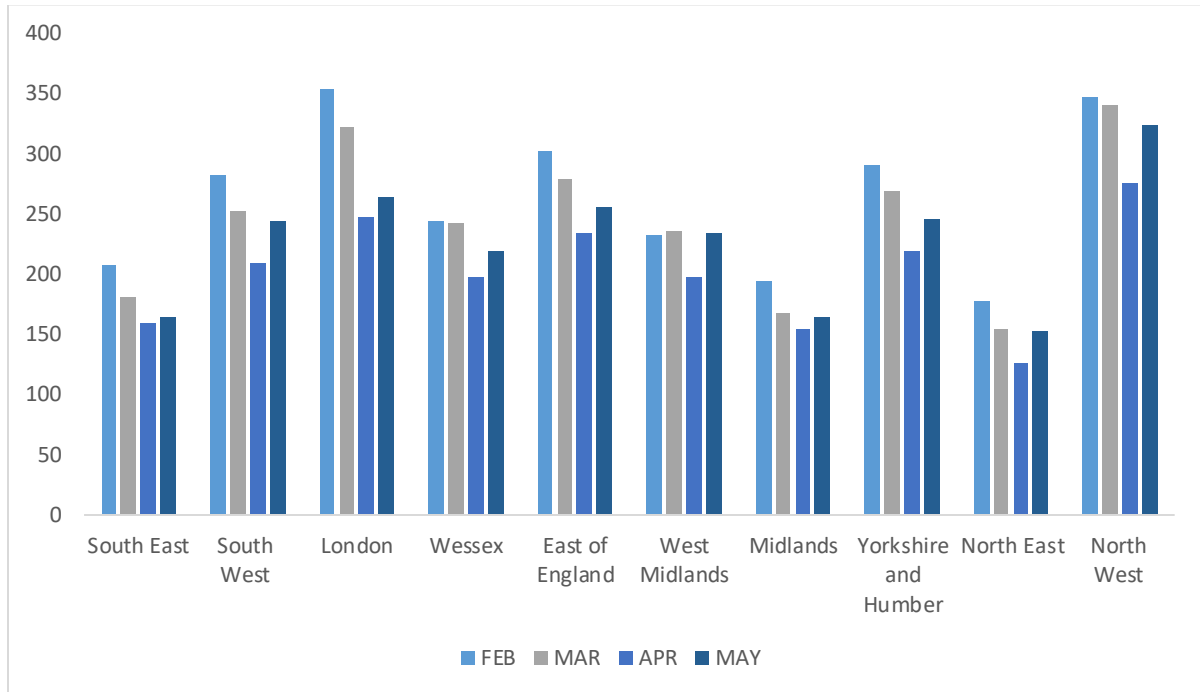

**Figure 3s.**

Average weekly courses (blue) and attendances (orange) following adjustment for missing data by individual cancer diagnoses and separately all palliative courses.

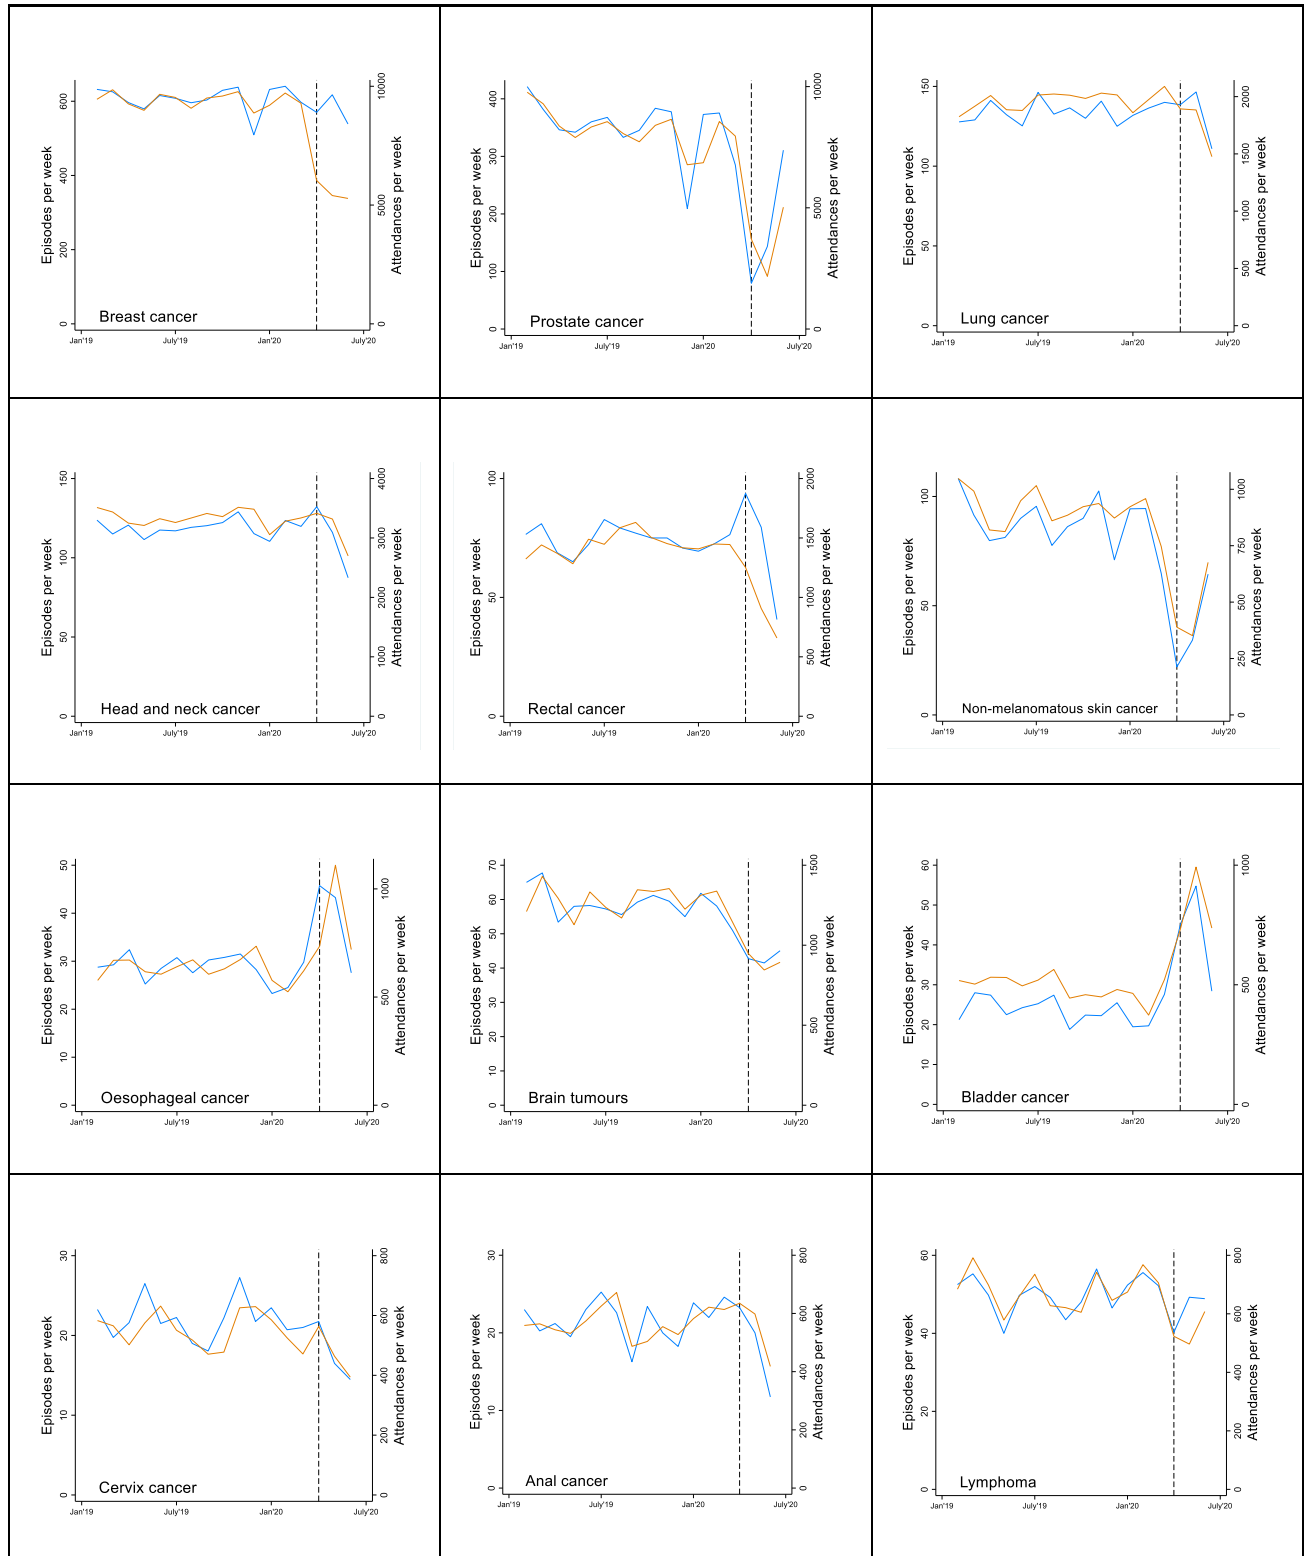

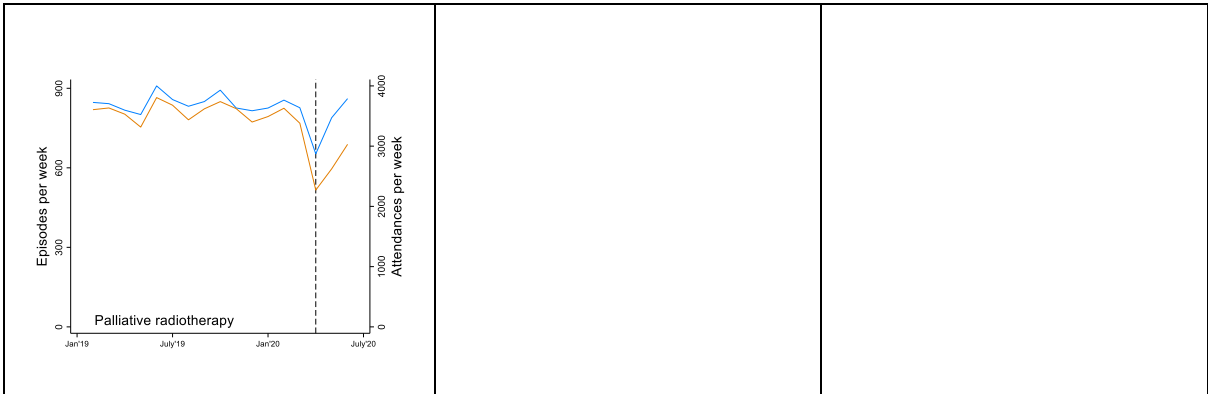

**Figure 4s.**

Bar chart demonstrating the average weekly number of treatment courses delivered to patients of less than 70 years old and 70 and over in 2019 and February-June 2020. Including treatment of curative, palliative and other intent and adjusted for missing data.

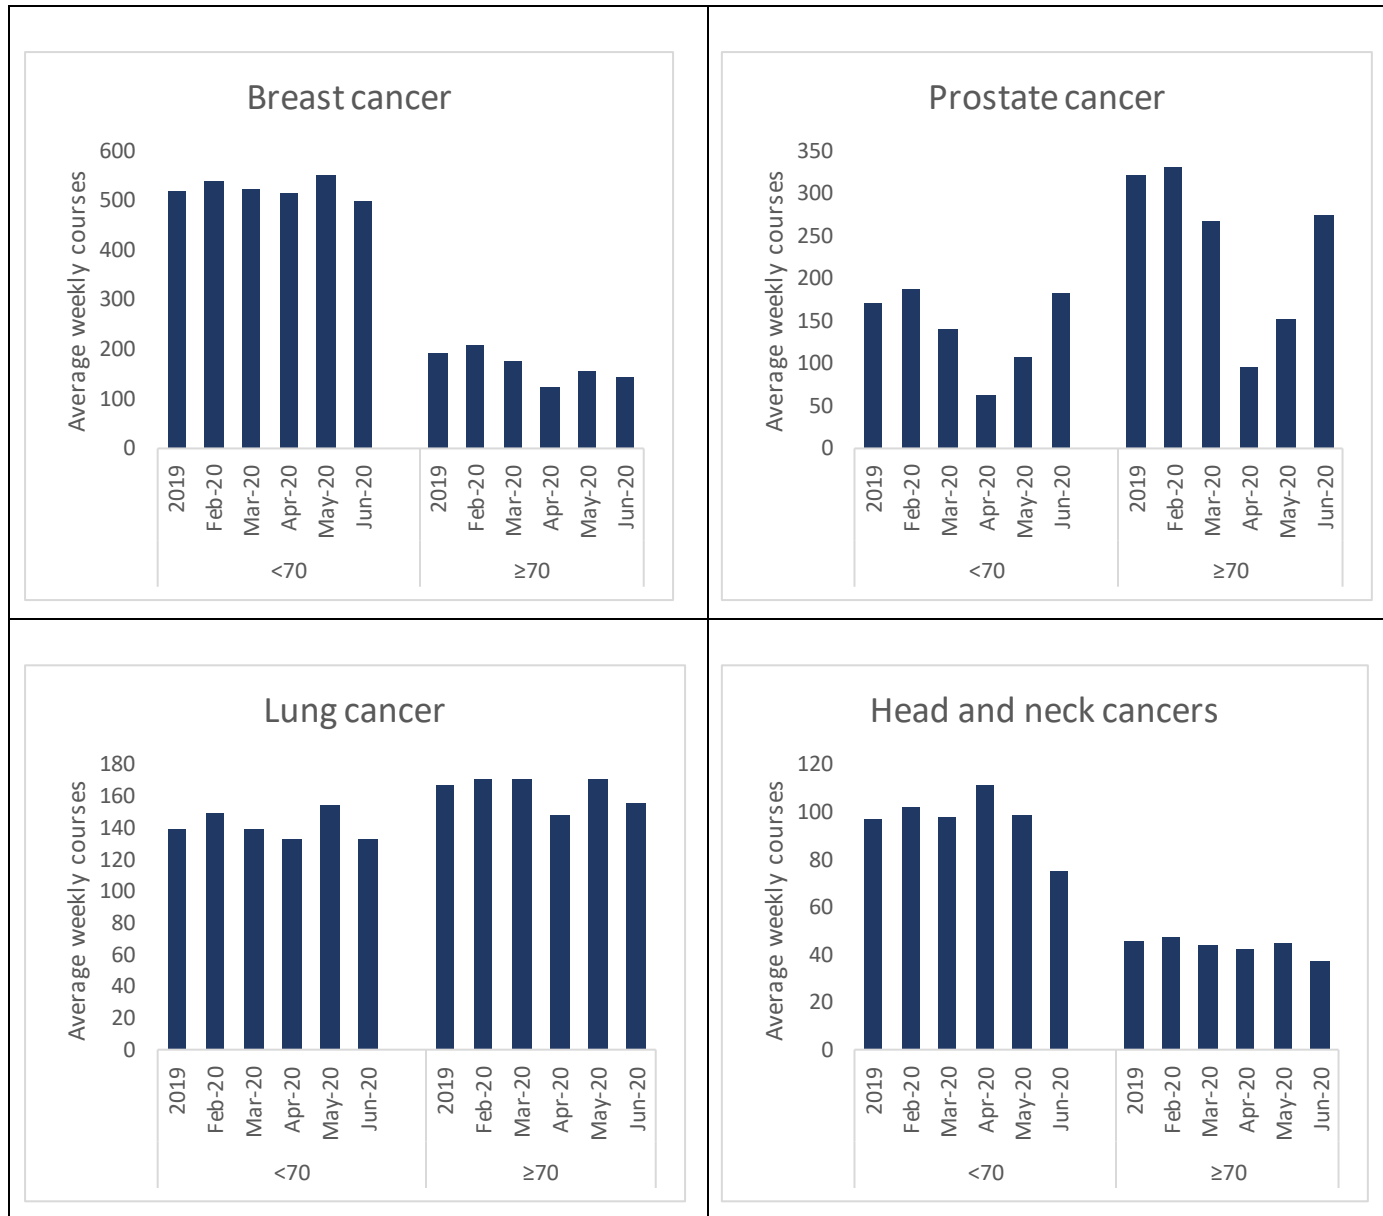

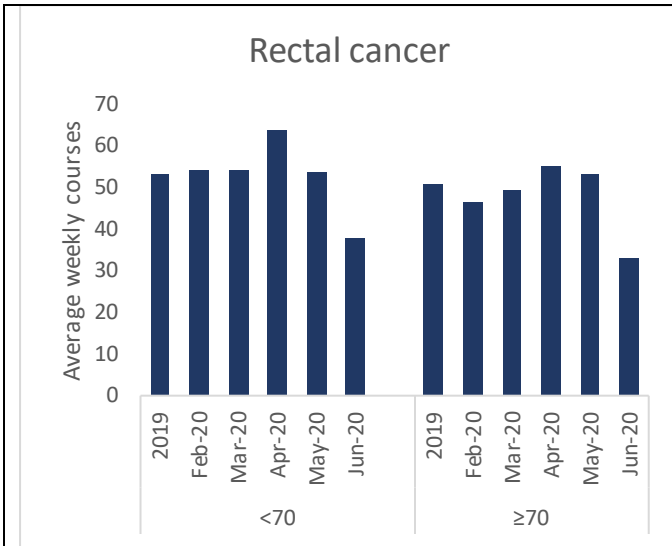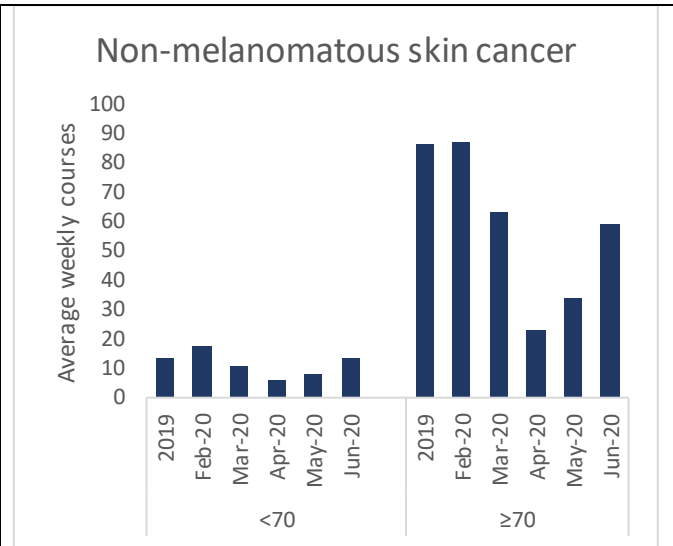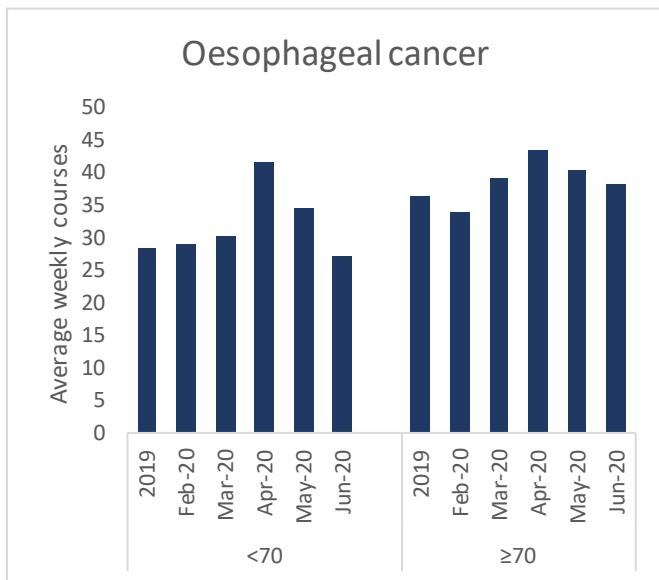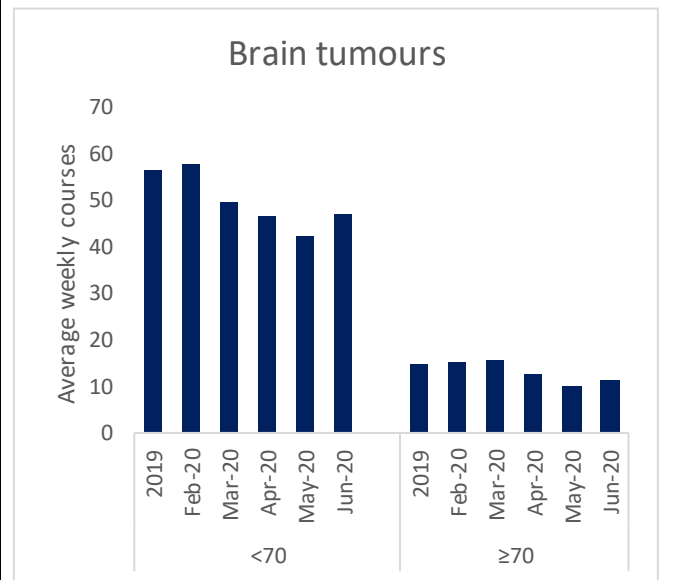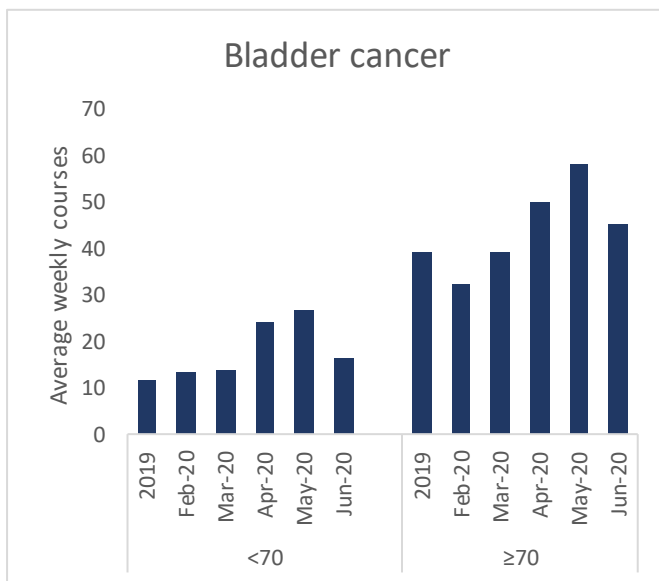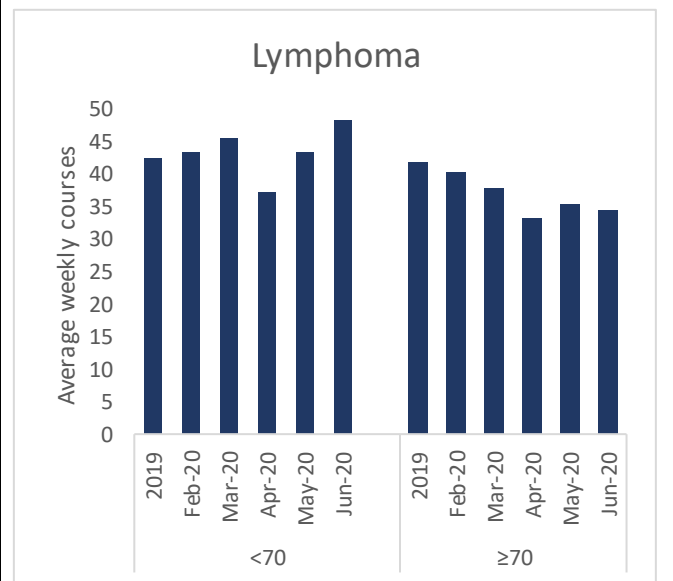

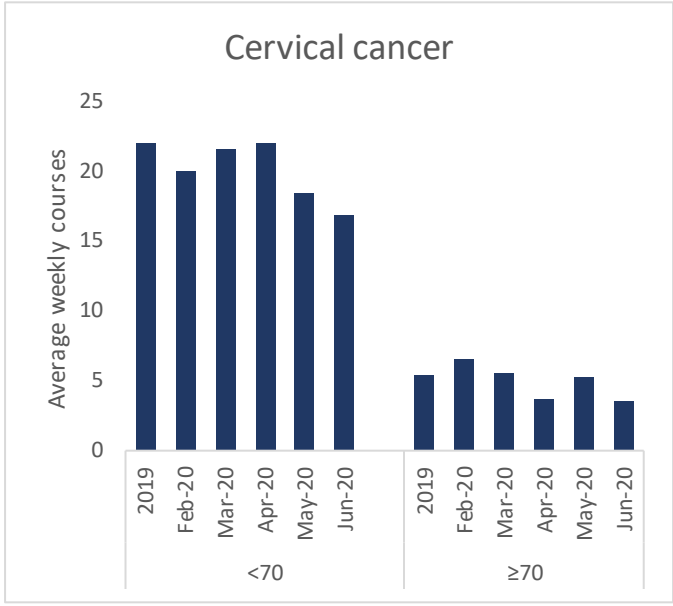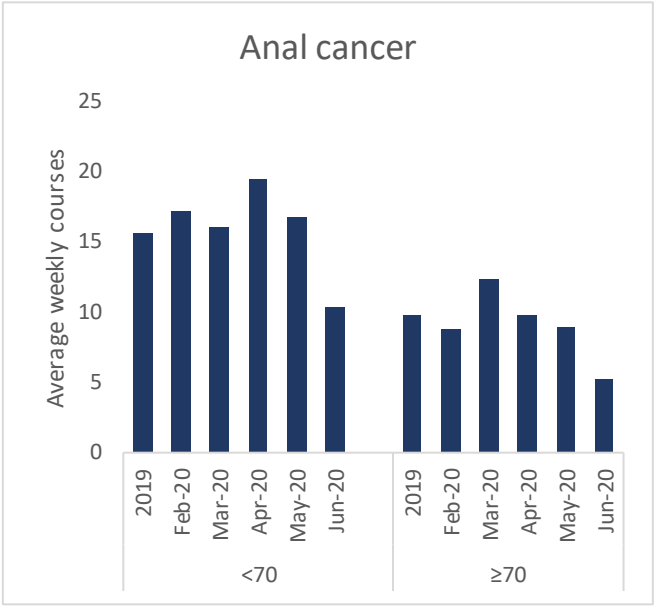

Supplement: mmc1.pdf [file mmc1.pdf]
